# Supplementary material
Source: PubMed Central journal article supplement (PMC8087270)
Supplement: glaa215_suppl_supplementary_material.pdf [file glaa215_suppl_supplementary_material.pdf]

## **17 $\alpha$ -estradiol modulates IGF1 and hepatic gene expression in a sex-specific manner**

### Supplemental Material

eFigure 1: Individual GH pulse patterns over a 6-hour period in male C57BL6/n control (CON) mice at baseline. n=8/group

eFigure 2: Individual GH pulse patterns over a 6-hour period in male C57BL6/n mice at baseline prior to 17 $\alpha$ -E2 treatment. n=8/group

eFigure 3: Individual GH pulse patterns over a 6-hour period in male C57BL6/n CON mice following the 15 week treatment period. n=8/group

eFigure 4: Individual GH pulse patterns over a 6-hour period in male C57BL6/n mice following 15 weeks of 17 $\alpha$ -E2 treatment. n=8/group

eTable 1 – Differentially expressed genes by 17  $\alpha$  estradiol in normal control male mice

eTable 2 – Differentially expressed genes by 17  $\alpha$  estradiol in growth hormone receptor knockout male mice

eTable 2 – Differentially expressed genes by 17  $\alpha$  estradiol in normal control female mice

eTable 4 – Differentially expressed genes by 17  $\alpha$  estradiol in growth hormone receptor knockout female mice

eTable 5 – Regulated KEGG pathways by 17  $\alpha$  estradiol in normal control male mice

eTable 6 – Regulated KEGG pathways by 17  $\alpha$  estradiol in growth hormone receptor knockout male mice

eTable 7 – Regulated KEGG pathways by 17  $\alpha$  estradiol in normal control female mice

eTable 8 – Regulated KEGG pathways by 17  $\alpha$  estradiol in growth hormone receptor knockout female mice

eFigure 1: Individual GH pulse patterns over a 6-hour period in male C57BL/6n control (CON) mice at baseline. n=8/group

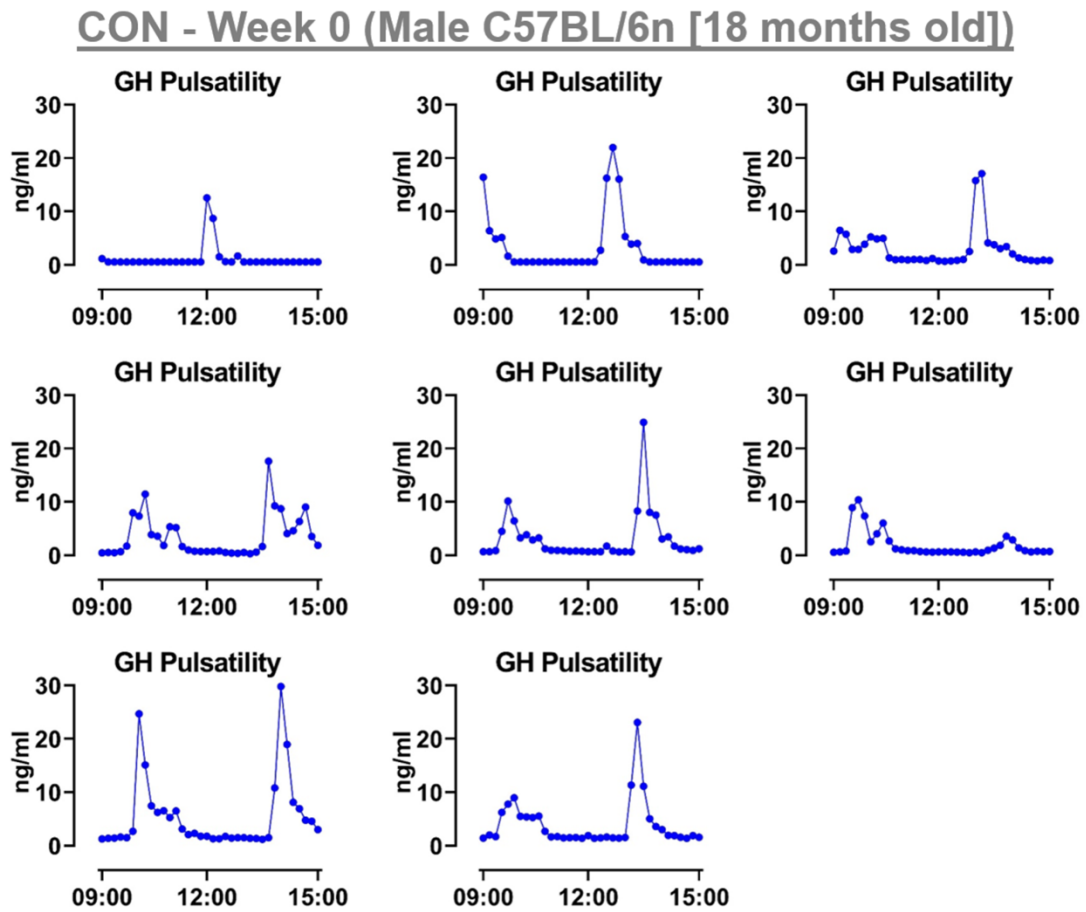

eFigure 2: Individual GH pulse patterns over a 6-hour period in male C57BL/6n mice at baseline prior to 17 $\alpha$ -E2 treatment. n=8/group

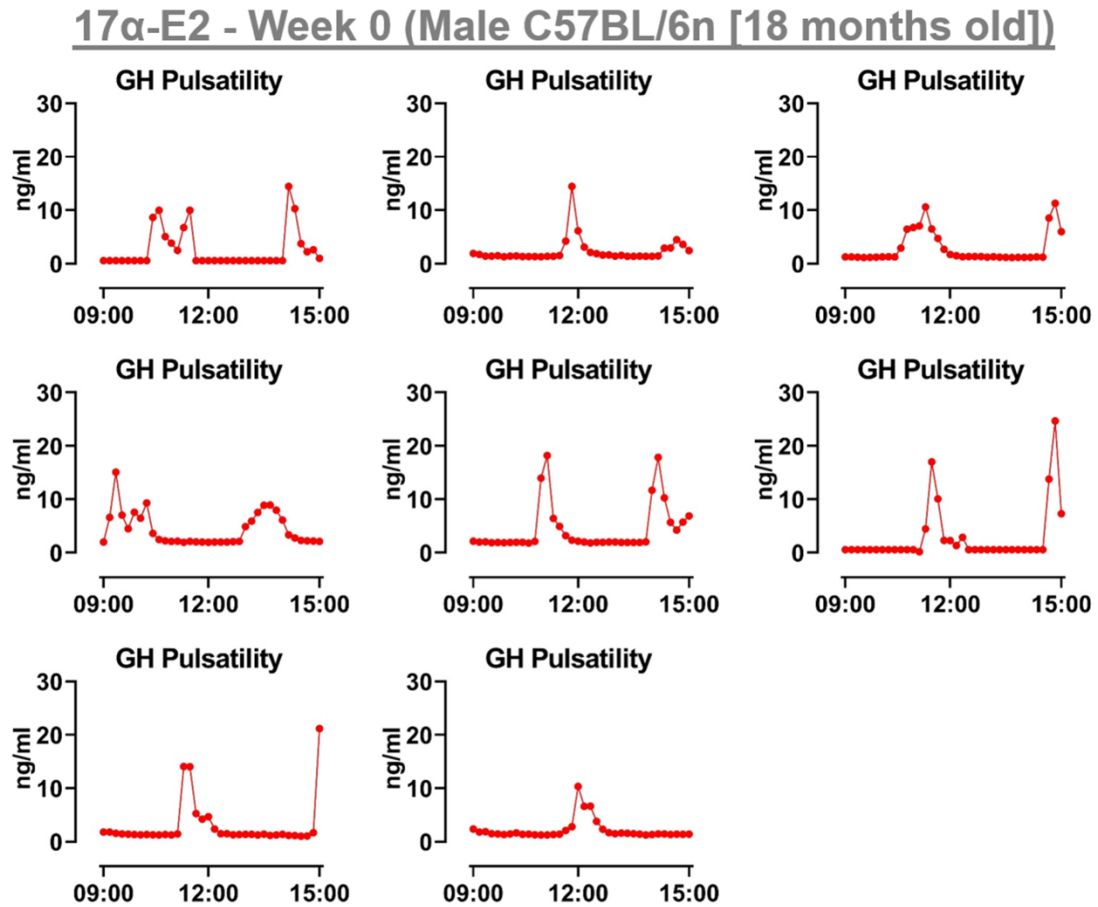

eFigure 3: Individual GH pulse patterns over a 6-hour period in male C57BL/6n CON mice following the 15 week treatment period. n=8/group

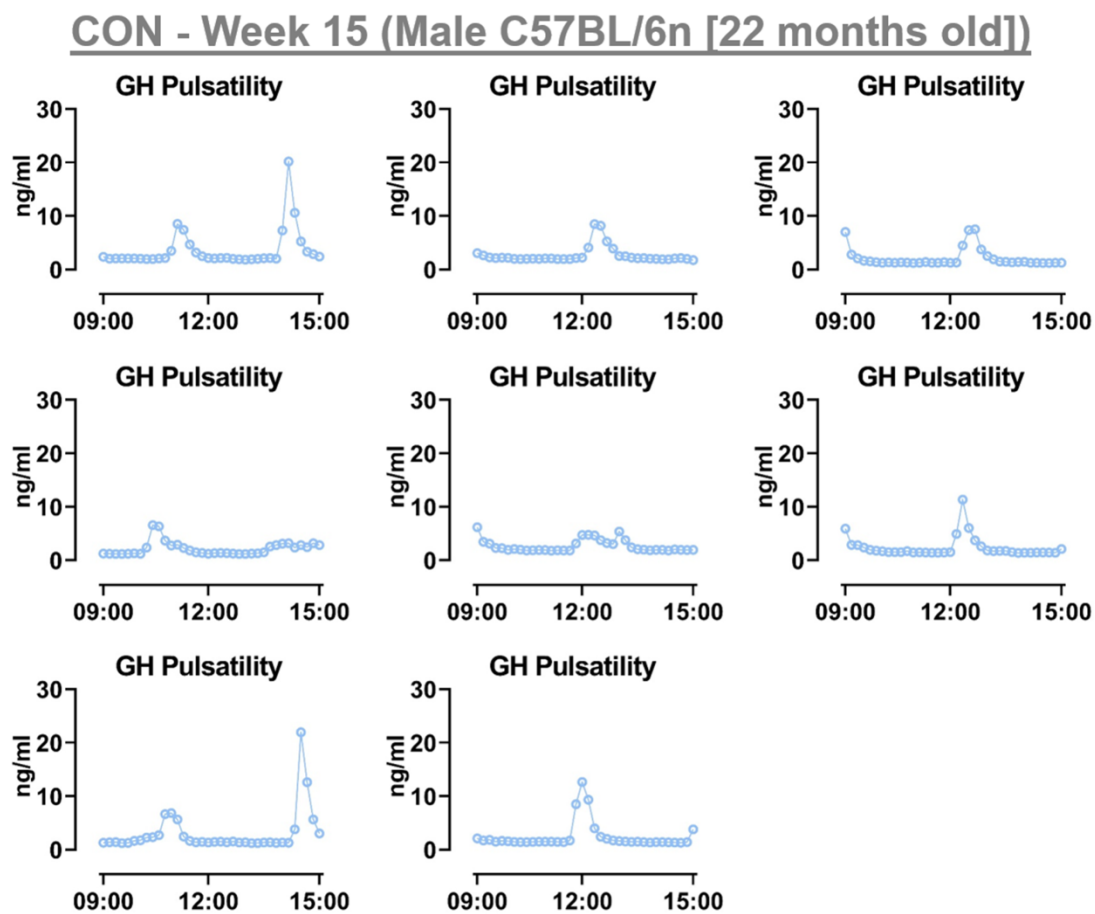

eFigure 4: Individual GH pulse patterns over a 6-hour period in male C57BL6/n mice following 15 weeks of  $17\alpha$ -E2 treatment. n=8/group

### 17 $\alpha$ -E2 - Week 15 (Male C57BL/6n [22 months old])

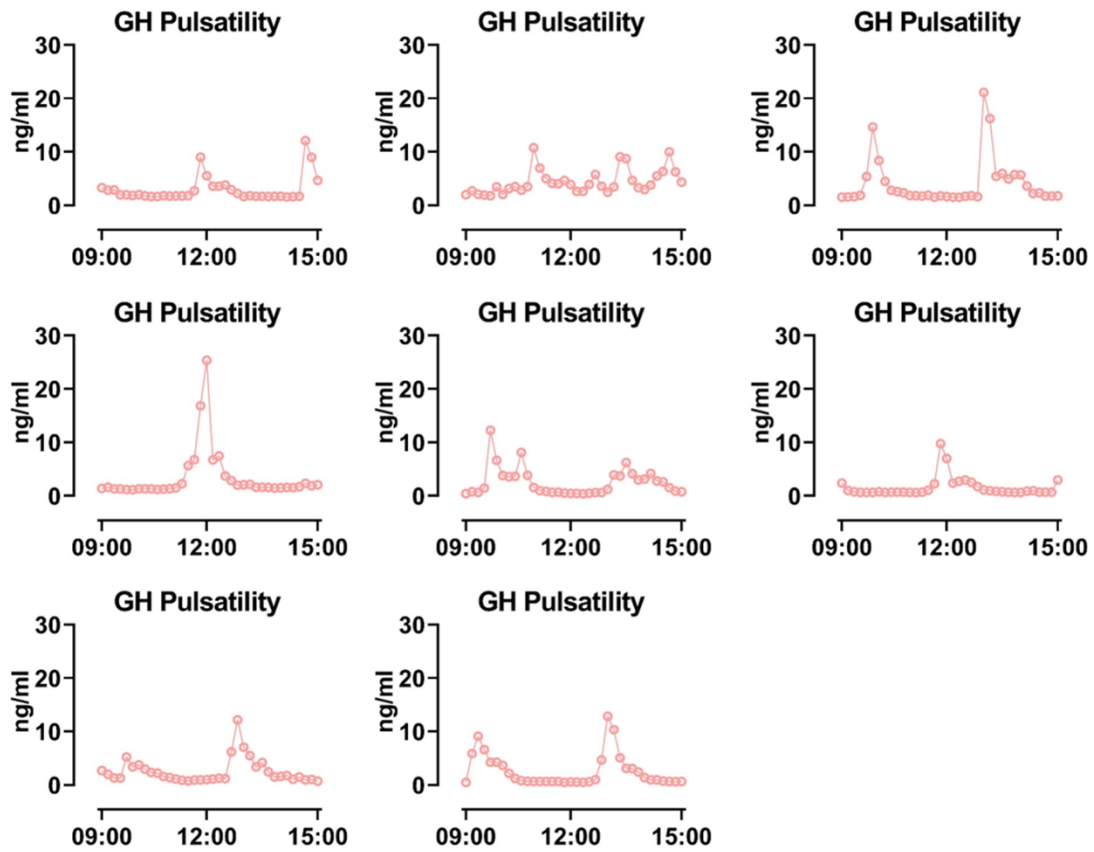

eTable 1 – Differentially expressed genes by 17  $\alpha$  estradiol in normal control male mice

| Gene     | logFC | logCPM | PValue   | FDR      |
|----------|-------|--------|----------|----------|
| Col16a1  | 3.54  | 2.94   | 2.68E-26 | 3.85E-22 |
| Spon1    | 5.38  | 2.32   | 7.66E-19 | 5.50E-15 |
| Scd3     | 8.10  | 1.91   | 1.08E-17 | 5.17E-14 |
| Aff3     | 3.74  | 0.55   | 9.59E-16 | 3.44E-12 |
| Mmp27    | 7.49  | 1.00   | 1.37E-13 | 3.94E-10 |
| Med12l   | 4.01  | 0.09   | 2.89E-13 | 6.92E-10 |
| Arhgap10 | 2.99  | 1.25   | 4.29E-13 | 8.80E-10 |
| Abcb1a   | 2.01  | 3.83   | 8.79E-13 | 1.58E-09 |
| Ppard    | -2.35 | 3.54   | 4.56E-12 | 7.27E-09 |
| Bnc2     | 5.38  | -0.90  | 1.32E-11 | 1.90E-08 |
| Tmem200b | 2.57  | 2.03   | 4.21E-11 | 5.49E-08 |
| Pik3c2g  | 1.18  | 4.36   | 1.14E-10 | 1.36E-07 |
| Osbpl3   | 3.18  | 4.01   | 2.08E-09 | 2.29E-06 |
| Lmod3    | 5.16  | 0.76   | 2.36E-09 | 2.42E-06 |
| Serpina7 | -2.23 | 6.72   | 4.75E-09 | 4.54E-06 |
| S100g    | 6.63  | 1.33   | 1.24E-08 | 1.11E-05 |
| Apoc2    | 1.53  | 9.32   | 1.66E-08 | 1.40E-05 |
| Smtnl2   | 2.20  | 0.95   | 2.68E-08 | 2.14E-05 |
| Ttc3     | 0.79  | 4.76   | 5.86E-08 | 4.43E-05 |
| Gpcpd1   | 1.65  | 6.08   | 1.66E-07 | 1.19E-04 |
| Tspan8   | 2.98  | 1.98   | 1.79E-07 | 1.21E-04 |
| Insc     | -1.54 | 3.67   | 1.89E-07 | 1.21E-04 |
| Prkd1    | 3.33  | -1.03  | 1.94E-07 | 1.21E-04 |
| Adam19   | 2.87  | 1.58   | 2.75E-07 | 1.65E-04 |
| Slc39a4  | -1.54 | 5.65   | 3.01E-07 | 1.73E-04 |
| Mme      | 3.43  | 4.20   | 3.45E-07 | 1.91E-04 |
| Aldh1b1  | -1.29 | 6.06   | 3.98E-07 | 2.12E-04 |
| Mfge8    | 1.56  | 4.03   | 5.95E-07 | 3.05E-04 |
| Nnmt     | -3.08 | 5.75   | 6.79E-07 | 3.36E-04 |
| Slc40a1  | 1.02  | 7.16   | 7.76E-07 | 3.71E-04 |
| Scnn1a   | -1.05 | 5.22   | 1.38E-06 | 0.001    |
| Cuedc1   | 1.58  | 2.21   | 3.49E-06 | 0.002    |
| Pkd2     | 2.31  | 3.41   | 3.81E-06 | 0.002    |
| Efna3    | -2.50 | 1.11   | 3.82E-06 | 0.002    |
| Tmem56   | 0.89  | 7.55   | 5.00E-06 | 0.002    |
| Nucb2    | 1.84  | 1.49   | 5.56E-06 | 0.002    |
| H19      | 5.09  | 2.78   | 5.70E-06 | 0.002    |
| Isyna1   | 2.71  | 4.74   | 5.82E-06 | 0.002    |

|               |       |       |          |       |
|---------------|-------|-------|----------|-------|
| Tubb4b        | -1.19 | 6.31  | 6.13E-06 | 0.002 |
| Ada           | 2.09  | 0.78  | 7.30E-06 | 0.003 |
| Cd63          | 2.03  | 3.50  | 7.33E-06 | 0.003 |
| Lsr           | -0.76 | 7.07  | 8.22E-06 | 0.003 |
| Slc35f2       | 3.39  | -1.12 | 8.89E-06 | 0.003 |
| Tubb2a        | -2.00 | 6.10  | 9.45E-06 | 0.003 |
| Cyp2a22       | 2.89  | 7.38  | 1.02E-05 | 0.003 |
| Dnahc11       | 2.37  | 0.90  | 1.06E-05 | 0.003 |
| Ier5          | -1.61 | 2.67  | 1.07E-05 | 0.003 |
| Syne4         | -2.64 | 1.27  | 1.14E-05 | 0.003 |
| E130307A14Rik | 1.50  | 0.13  | 1.20E-05 | 0.004 |
| Rundc3b       | 1.74  | -0.31 | 1.27E-05 | 0.004 |
| Tbc1d4        | 1.21  | 1.98  | 1.85E-05 | 0.005 |
| Pak1          | 2.23  | 1.61  | 1.97E-05 | 0.005 |
| Lima1         | 0.70  | 5.83  | 2.35E-05 | 0.006 |
| BC089597      | -1.42 | 6.61  | 2.52E-05 | 0.007 |
| St5           | -1.26 | 5.11  | 2.53E-05 | 0.007 |
| D16Ertd472e   | 0.91  | 2.82  | 2.56E-05 | 0.007 |
| Snrpa         | -0.73 | 4.79  | 3.03E-05 | 0.008 |
| Pnrc1         | -1.22 | 6.37  | 3.04E-05 | 0.008 |
| Galc          | 0.64  | 2.81  | 3.09E-05 | 0.008 |
| Crip2         | -1.16 | 5.99  | 3.21E-05 | 0.008 |
| Hif1a         | 0.65  | 4.89  | 3.36E-05 | 0.008 |
| Fam126b       | 0.98  | 4.26  | 3.38E-05 | 0.008 |
| Sh3bgrl2      | 0.60  | 5.05  | 3.47E-05 | 0.008 |
| Tff3          | 4.13  | 2.85  | 3.62E-05 | 0.008 |
| Zfp704        | 0.83  | 3.88  | 3.85E-05 | 0.009 |
| Nelfa         | -0.67 | 3.47  | 3.98E-05 | 0.009 |
| Slc4a4        | 0.74  | 6.83  | 3.99E-05 | 0.009 |
| Plekhg5       | 0.94  | 3.49  | 4.05E-05 | 0.009 |
| Npas2         | -3.28 | 1.77  | 4.35E-05 | 0.009 |
| Thtpa         | -0.52 | 4.72  | 4.99E-05 | 0.010 |
| Senp6         | 0.51  | 5.16  | 5.05E-05 | 0.010 |
| Rasl11b       | 1.45  | 2.02  | 5.47E-05 | 0.011 |
| Lpar1         | 1.78  | -0.05 | 5.68E-05 | 0.011 |
| Proser2       | -0.81 | 4.72  | 5.75E-05 | 0.011 |
| Gale          | -1.50 | 3.87  | 5.99E-05 | 0.011 |
| 6430573F11Rik | 1.38  | 1.41  | 6.01E-05 | 0.011 |
| Nceh1         | 0.93  | 4.86  | 6.11E-05 | 0.011 |
| Traf3ip2      | 0.98  | 2.15  | 6.23E-05 | 0.011 |

|           |       |       |          |       |
|-----------|-------|-------|----------|-------|
| Tceal5    | 4.00  | -1.97 | 6.32E-05 | 0.011 |
| Tubb6     | -1.19 | 3.28  | 6.70E-05 | 0.012 |
| Tiam1     | 1.66  | 0.21  | 6.77E-05 | 0.012 |
| Med24     | -0.64 | 4.08  | 7.03E-05 | 0.012 |
| Cry1      | -1.37 | 3.03  | 7.05E-05 | 0.012 |
| Agpat2    | -0.75 | 7.85  | 7.25E-05 | 0.012 |
| Hist2h2be | -0.95 | 1.11  | 7.56E-05 | 0.013 |
| Rybp      | 0.85  | 2.63  | 8.72E-05 | 0.015 |
| Elov13    | -2.19 | 5.65  | 8.94E-05 | 0.015 |
| Calml4    | 1.79  | -0.05 | 8.99E-05 | 0.015 |
| Adam12    | 1.90  | -1.32 | 9.31E-05 | 0.015 |
| Ckmt1     | 3.69  | -1.64 | 1.02E-04 | 0.016 |
| Myo6      | 0.52  | 5.59  | 1.02E-04 | 0.016 |
| Nfil3     | -1.52 | 4.77  | 1.03E-04 | 0.016 |
| Tet2      | 0.80  | 3.58  | 1.09E-04 | 0.017 |
| Sgsm1     | -1.25 | 1.79  | 1.10E-04 | 0.017 |
| Hist2h3c2 | -1.46 | 1.01  | 1.11E-04 | 0.017 |
| Fgfr4     | -0.57 | 5.94  | 1.11E-04 | 0.017 |
| Serpina12 | 2.58  | 4.10  | 1.18E-04 | 0.017 |
| Dbnnd2    | -0.74 | 3.46  | 1.18E-04 | 0.017 |
| Diap2     | 0.61  | 3.87  | 1.20E-04 | 0.017 |
| Tuba4a    | -0.95 | 7.30  | 1.21E-04 | 0.017 |
| Dcun1d4   | 0.57  | 5.36  | 1.23E-04 | 0.017 |
| Vil1      | 3.59  | 0.09  | 1.23E-04 | 0.017 |
| Large     | 0.82  | 2.34  | 1.25E-04 | 0.017 |
| Tmem9     | 0.52  | 4.72  | 1.28E-04 | 0.018 |
| Hist2h3c1 | -1.19 | 2.73  | 1.29E-04 | 0.018 |
| Parp16    | -1.32 | 5.83  | 1.32E-04 | 0.018 |
| Arg2      | 2.69  | -1.49 | 1.37E-04 | 0.018 |
| Morc4     | 1.25  | 1.71  | 1.39E-04 | 0.018 |
| Tbkbp1    | -0.71 | 3.59  | 1.40E-04 | 0.018 |
| Plcb4     | 1.51  | -0.76 | 1.45E-04 | 0.019 |
| Ctr9      | 0.42  | 4.84  | 1.45E-04 | 0.019 |
| Rgs7      | 1.83  | -1.09 | 1.45E-04 | 0.019 |
| Sptssa    | 0.58  | 5.48  | 1.46E-04 | 0.019 |
| Mpst      | -0.66 | 6.64  | 1.48E-04 | 0.019 |
| Krt4      | 4.46  | -0.64 | 1.67E-04 | 0.021 |
| C1rb      | -1.62 | 0.08  | 1.77E-04 | 0.022 |
| Fgfr2     | 0.67  | 5.44  | 1.78E-04 | 0.022 |
| Gdf15     | 1.75  | 3.75  | 1.79E-04 | 0.022 |



|               |       |       |          |       |
|---------------|-------|-------|----------|-------|
| Cyp2g1        | 2.19  | 0.79  | 1.86E-04 | 0.022 |
| Uap1l1        | 1.65  | 2.70  | 1.87E-04 | 0.022 |
| Mrps12        | -0.65 | 4.53  | 1.94E-04 | 0.023 |
| Slco2a1       | 0.87  | 5.22  | 1.95E-04 | 0.023 |
| Gm15441       | 3.19  | 0.06  | 1.97E-04 | 0.023 |
| Dnmt3b        | -1.25 | 1.64  | 2.08E-04 | 0.024 |
| Lrrtm3        | 4.00  | 0.51  | 2.09E-04 | 0.024 |
| Sigirr        | -0.58 | 4.87  | 2.10E-04 | 0.024 |
| Irf5          | -1.19 | 2.59  | 2.23E-04 | 0.025 |
| Spsb4         | -1.29 | 3.10  | 2.27E-04 | 0.025 |
| Chmp4c        | 1.64  | -0.68 | 2.38E-04 | 0.026 |
| Alkbh7        | -0.76 | 4.06  | 2.46E-04 | 0.027 |
| Ppa1          | -0.60 | 7.22  | 2.47E-04 | 0.027 |
| Hkdc1         | 3.64  | -0.24 | 2.50E-04 | 0.027 |
| Tmtc2         | 0.79  | 3.63  | 2.68E-04 | 0.029 |
| Gfod2         | -0.77 | 3.54  | 2.83E-04 | 0.030 |
| Fhdc1         | 2.71  | -1.89 | 2.85E-04 | 0.030 |
| 2010003K11Rik | -1.24 | 5.31  | 2.95E-04 | 0.031 |
| Rps13         | -0.78 | 6.77  | 3.00E-04 | 0.031 |
| C4a           | 1.21  | 6.85  | 3.03E-04 | 0.031 |
| Josd2         | -0.71 | 4.86  | 3.04E-04 | 0.031 |
| Copg1         | -0.49 | 6.40  | 3.13E-04 | 0.032 |
| Wnk4          | 1.49  | 1.57  | 3.16E-04 | 0.032 |
| Gm15348       | -3.44 | 0.29  | 3.24E-04 | 0.033 |
| Cd36          | 1.04  | 7.46  | 3.31E-04 | 0.033 |
| Ndrp1         | -1.44 | 4.59  | 3.48E-04 | 0.035 |
| Pnp           | -0.71 | 6.60  | 3.67E-04 | 0.036 |
| Peo1          | 0.51  | 5.16  | 3.68E-04 | 0.036 |
| Sdhaf1        | -0.64 | 4.35  | 3.70E-04 | 0.036 |
| Tubb5         | -0.67 | 5.94  | 3.71E-04 | 0.036 |
| Rev3l         | 0.69  | 3.67  | 4.04E-04 | 0.039 |
| Tubb2b        | -2.31 | -0.12 | 4.05E-04 | 0.039 |
| Sparcl1       | 2.15  | 2.32  | 4.11E-04 | 0.039 |
| Saa2          | -5.07 | 10.10 | 4.13E-04 | 0.039 |
| Lox14         | -1.74 | -0.26 | 4.17E-04 | 0.039 |
| Cyp26a1       | -1.82 | 5.39  | 4.28E-04 | 0.040 |
| Dpp9          | -0.67 | 5.77  | 4.43E-04 | 0.041 |
| 4930404H11Rik | 7.07  | -0.13 | 4.52E-04 | 0.042 |
| Pik3ap1       | 0.63  | 5.60  | 4.68E-04 | 0.043 |
| Map3k5        | 0.57  | 5.16  | 4.72E-04 | 0.043 |

|               |       |       |          |       |
|---------------|-------|-------|----------|-------|
| Adra1b        | -0.72 | 6.25  | 4.77E-04 | 0.043 |
| Slc13a3       | -1.91 | 4.38  | 4.98E-04 | 0.045 |
| Chka          | -1.47 | 5.57  | 5.20E-04 | 0.046 |
| Mios          | 0.76  | 3.54  | 5.21E-04 | 0.046 |
| Atp11a        | -1.26 | 5.65  | 5.32E-04 | 0.046 |
| 2510049J12Rik | -0.47 | 4.55  | 5.33E-04 | 0.046 |
| Slc35g1       | 0.72  | 4.60  | 5.33E-04 | 0.046 |
| Tmx4          | 0.57  | 3.87  | 5.39E-04 | 0.047 |
| Abtb2         | -0.93 | 4.03  | 5.53E-04 | 0.048 |
| Muc2          | 4.99  | -1.13 | 5.61E-04 | 0.048 |
| Zfp707        | -0.48 | 4.94  | 5.71E-04 | 0.049 |
| Sigmar1       | -0.61 | 6.98  | 5.85E-04 | 0.049 |

---

eTable 2 – Differentially expressed genes by 17  $\alpha$  estradiol in growth hormone receptor knockout male mice

| Gene      | logFC | logCPM | PValue   | FDR      |
|-----------|-------|--------|----------|----------|
| Csrp3     | 3.27  | 4.31   | 2.33E-10 | 3.35E-06 |
| Slc22a26  | 3.42  | 4.81   | 2.56E-08 | 1.84E-04 |
| Parp16    | -1.82 | 5.83   | 2.07E-07 | 0.001    |
| Pmm1      | 1.29  | 2.72   | 1.07E-06 | 0.004    |
| Il13ra2   | 5.60  | -2.21  | 2.06E-06 | 0.006    |
| Sult3a1   | 4.36  | 7.09   | 4.79E-06 | 0.011    |
| Paqr9     | 1.55  | 6.88   | 5.40E-06 | 0.011    |
| Gm4794    | 5.51  | 5.19   | 1.11E-05 | 0.020    |
| Agtr1a    | 0.65  | 5.99   | 1.58E-05 | 0.025    |
| Tnfaip811 | 1.02  | 4.92   | 2.01E-05 | 0.026    |
| Adck5     | 1.02  | 4.53   | 2.02E-05 | 0.026    |
| Col27a1   | -1.36 | 5.75   | 2.20E-05 | 0.026    |
| Fetub     | 1.04  | 9.22   | 2.57E-05 | 0.028    |
| Spon1     | 2.22  | 2.32   | 3.36E-05 | 0.034    |
| AW549542  | 1.56  | 3.62   | 5.14E-05 | 0.049    |

eTable 3 – Differentially expressed genes by 17  $\alpha$  estradiol in normal control female mice

| Gene          | logFC | logCPM | PValue   | FDR      |
|---------------|-------|--------|----------|----------|
| Tspan8        | 4.57  | 1.98   | 7.10E-14 | 8.33E-10 |
| Tff3          | 9.42  | 2.85   | 1.16E-13 | 8.33E-10 |
| Apoc2         | 1.78  | 9.32   | 5.59E-11 | 2.67E-07 |
| Col16a1       | 1.89  | 2.94   | 1.53E-09 | 5.47E-06 |
| Tmem200b      | 2.27  | 2.03   | 3.74E-09 | 1.07E-05 |
| Osbp13        | 3.08  | 4.01   | 6.40E-09 | 1.53E-05 |
| Marveld3      | 2.60  | 1.40   | 1.52E-08 | 3.12E-05 |
| Gpr64         | 2.79  | 0.87   | 4.49E-08 | 8.06E-05 |
| Treh          | 2.97  | 0.74   | 9.96E-08 | 1.59E-04 |
| Gria3         | 3.80  | -0.49  | 1.18E-07 | 1.69E-04 |
| 3930402G23Rik | 5.23  | 0.29   | 1.48E-07 | 1.93E-04 |
| Gpcpd1        | 1.64  | 6.08   | 1.91E-07 | 2.29E-04 |
| Bnc2          | 3.67  | -0.90  | 4.12E-07 | 4.55E-04 |
| Spink3        | 7.67  | 1.31   | 8.51E-07 | 0.001    |
| Aldh1l1       | -0.91 | 10.27  | 9.53E-07 | 0.001    |
| Mup20         | 3.15  | 7.16   | 1.53E-06 | 0.001    |
| Sult1e1       | 3.19  | 6.20   | 1.72E-06 | 0.001    |
| Adcy1         | 4.99  | 1.52   | 2.27E-06 | 0.002    |
| Lepr          | 3.26  | 2.91   | 2.34E-06 | 0.002    |
| Serpina12     | 3.25  | 4.10   | 2.54E-06 | 0.002    |
| Rgs7          | 2.32  | -1.09  | 2.82E-06 | 0.002    |
| Cyp4a31       | 3.56  | 3.81   | 2.90E-06 | 0.002    |
| Lor           | 2.16  | -0.20  | 3.03E-06 | 0.002    |
| Ddx3y         | 4.63  | 4.38   | 3.08E-06 | 0.002    |
| Scd3          | 3.69  | 1.91   | 3.10E-06 | 0.002    |
| Defb1         | 3.94  | 0.79   | 3.26E-06 | 0.002    |
| Hspb8         | -1.06 | 7.65   | 3.30E-06 | 0.002    |
| Adra1b        | -0.95 | 6.25   | 3.47E-06 | 0.002    |
| Mtnr1a        | 2.06  | 1.84   | 4.14E-06 | 0.002    |
| Serpine1      | 3.05  | 2.14   | 4.26E-06 | 0.002    |
| Rgs3          | 1.66  | 3.35   | 4.33E-06 | 0.002    |
| Spon1         | 2.45  | 2.32   | 4.39E-06 | 0.002    |
| Uty           | 4.89  | 2.09   | 5.66E-06 | 0.002    |
| Scnn1a        | -0.99 | 5.22   | 5.89E-06 | 0.002    |
| Gm4841        | -3.31 | 0.12   | 5.91E-06 | 0.002    |
| Cxcl14        | 3.64  | 1.41   | 8.68E-06 | 0.003    |
| Adh4          | -0.89 | 6.45   | 9.08E-06 | 0.004    |
| Tceal5        | 4.69  | -1.97  | 1.05E-05 | 0.004    |

|               |       |       |          |       |
|---------------|-------|-------|----------|-------|
| Cyp2d12       | 3.85  | 1.70  | 1.13E-05 | 0.004 |
| Cntnap1       | 1.37  | 2.32  | 1.26E-05 | 0.005 |
| Gcat          | -0.68 | 6.61  | 1.31E-05 | 0.005 |
| Atp11a        | -1.59 | 5.65  | 1.40E-05 | 0.005 |
| Paox          | -0.95 | 4.67  | 1.66E-05 | 0.006 |
| Cdh1          | 2.39  | 3.36  | 1.72E-05 | 0.006 |
| S100a8        | 3.47  | 2.61  | 1.83E-05 | 0.006 |
| Aff3          | 1.82  | 0.55  | 1.95E-05 | 0.006 |
| Gla           | -0.78 | 2.67  | 2.04E-05 | 0.006 |
| Eif2s3y       | 4.40  | 4.47  | 2.08E-05 | 0.006 |
| Mfge8         | 1.32  | 4.03  | 2.30E-05 | 0.007 |
| Omd           | 2.24  | 1.31  | 2.31E-05 | 0.007 |
| Ehhadh        | 1.41  | 8.75  | 2.48E-05 | 0.007 |
| Nid1          | 1.46  | 3.85  | 2.60E-05 | 0.007 |
| Irgm1         | -1.31 | 5.34  | 2.61E-05 | 0.007 |
| Ccdc149       | 1.94  | 0.42  | 2.68E-05 | 0.007 |
| Stat5a        | 0.77  | 4.73  | 2.72E-05 | 0.007 |
| Zbtb21        | -0.83 | 3.31  | 2.79E-05 | 0.007 |
| Isyna1        | 2.48  | 4.74  | 2.83E-05 | 0.007 |
| Stat1         | -1.57 | 5.68  | 3.28E-05 | 0.008 |
| Tmem56        | 0.80  | 7.55  | 3.29E-05 | 0.008 |
| Rnf32         | 1.97  | -1.94 | 3.49E-05 | 0.008 |
| Qpct          | 0.92  | 2.72  | 3.61E-05 | 0.008 |
| Golm1         | 1.34  | 1.46  | 3.96E-05 | 0.009 |
| S100a9        | 3.15  | 2.84  | 4.29E-05 | 0.010 |
| Apol9b        | -1.44 | 6.13  | 4.38E-05 | 0.010 |
| Gm15441       | 3.56  | 0.06  | 4.51E-05 | 0.010 |
| B930025P03Rik | 2.97  | 2.45  | 4.77E-05 | 0.010 |
| Lmod3         | 3.17  | 0.76  | 4.79E-05 | 0.010 |
| B230208H11Rik | 1.25  | 0.18  | 4.93E-05 | 0.010 |
| Igtp          | -2.24 | 5.34  | 4.94E-05 | 0.010 |
| Abcg8         | 0.78  | 7.36  | 5.05E-05 | 0.010 |
| Psme2         | -0.65 | 6.42  | 5.32E-05 | 0.011 |
| Rgs12         | -0.87 | 3.05  | 5.77E-05 | 0.011 |
| Krt4          | 4.88  | -0.64 | 5.92E-05 | 0.012 |
| Ntn3          | -1.22 | 1.78  | 6.65E-05 | 0.013 |
| Cd177         | 3.59  | -0.93 | 6.68E-05 | 0.013 |
| Adh1          | -0.69 | 10.76 | 7.31E-05 | 0.014 |
| Ccdc120       | 1.61  | 1.43  | 8.56E-05 | 0.016 |
| B930041F14Rik | 1.80  | 0.91  | 8.78E-05 | 0.016 |

|               |       |       |          |       |
|---------------|-------|-------|----------|-------|
| Acot1         | 2.52  | 4.69  | 9.19E-05 | 0.017 |
| Cpne2         | 0.97  | 2.50  | 9.31E-05 | 0.017 |
| Tor1b         | 0.66  | 5.44  | 1.05E-04 | 0.019 |
| Gm12250       | -2.98 | 2.27  | 1.08E-04 | 0.019 |
| 4833420G17Rik | 0.84  | 3.23  | 1.10E-04 | 0.019 |
| Gpc1          | 1.99  | 2.79  | 1.13E-04 | 0.019 |
| Gbp6          | -2.16 | 2.13  | 1.16E-04 | 0.019 |
| Sel1l3        | 1.19  | 3.49  | 1.17E-04 | 0.019 |
| Abcg5         | 0.76  | 6.79  | 1.17E-04 | 0.019 |
| Rasal1        | 2.75  | -1.04 | 1.27E-04 | 0.021 |
| Slc6a12       | -0.59 | 6.80  | 1.33E-04 | 0.021 |
| Dpysl4        | 3.09  | -2.33 | 1.35E-04 | 0.021 |
| Kif12         | 2.10  | -0.67 | 1.38E-04 | 0.022 |
| Gpx3          | 1.64  | 3.18  | 1.48E-04 | 0.023 |
| Hn1l          | -0.71 | 4.37  | 1.67E-04 | 0.026 |
| Spp1          | 1.66  | 5.30  | 1.67E-04 | 0.026 |
| Cblb          | 0.62  | 3.56  | 1.86E-04 | 0.028 |
| Zfp773        | -1.54 | -1.34 | 1.92E-04 | 0.029 |
| Hif3a         | 2.00  | -2.14 | 2.06E-04 | 0.031 |
| Scly          | -0.52 | 6.81  | 2.12E-04 | 0.031 |
| Gbp8          | -2.17 | 1.59  | 2.22E-04 | 0.032 |
| Isg15         | -1.30 | 2.82  | 2.24E-04 | 0.032 |
| Sdf2l1        | -1.39 | 4.92  | 2.37E-04 | 0.034 |
| Gbp3          | -1.91 | 3.01  | 2.48E-04 | 0.035 |
| Fgf21         | 2.22  | 3.76  | 2.55E-04 | 0.035 |
| Tmx2          | -0.52 | 5.46  | 2.56E-04 | 0.035 |
| Ints1         | -0.58 | 4.86  | 2.57E-04 | 0.035 |
| Hsd1l2        | 0.73  | 6.51  | 2.61E-04 | 0.035 |
| Apol9a        | -1.50 | 5.19  | 2.73E-04 | 0.037 |
| Plekhb1       | -0.73 | 5.80  | 2.84E-04 | 0.037 |
| Elovl2        | 0.73  | 8.62  | 2.87E-04 | 0.037 |
| Psat1         | 2.23  | -0.52 | 2.96E-04 | 0.037 |
| Sprn          | 1.38  | -0.07 | 2.96E-04 | 0.037 |
| F3            | 0.93  | 2.43  | 2.98E-04 | 0.037 |
| Traf3ip2      | 0.88  | 2.15  | 2.99E-04 | 0.037 |
| Adam11        | -1.07 | 6.62  | 2.99E-04 | 0.037 |
| Gpr56         | 1.49  | 1.53  | 3.01E-04 | 0.037 |
| Ppa1          | -0.60 | 7.22  | 3.02E-04 | 0.037 |
| Fbp2          | 2.17  | -1.10 | 3.12E-04 | 0.038 |
| Pdia4         | -0.78 | 7.51  | 3.19E-04 | 0.039 |

|               |       |       |          |       |
|---------------|-------|-------|----------|-------|
| Tnfrsf14      | -0.82 | 2.79  | 3.24E-04 | 0.039 |
| Iqsec1        | -0.55 | 5.74  | 3.33E-04 | 0.040 |
| Bik           | 1.26  | 3.02  | 3.43E-04 | 0.041 |
| Tmem64        | 0.63  | 5.27  | 3.47E-04 | 0.041 |
| Fam83a        | 3.40  | 0.34  | 3.48E-04 | 0.041 |
| Ugt2b37       | 1.98  | 0.55  | 3.54E-04 | 0.041 |
| Gbp1          | -1.94 | 3.32  | 3.58E-04 | 0.041 |
| Plk2          | 1.20  | 3.09  | 3.59E-04 | 0.041 |
| Cml1          | -0.81 | 7.44  | 3.64E-04 | 0.041 |
| BC016579      | 2.98  | -2.20 | 3.65E-04 | 0.041 |
| Phlda3        | 2.01  | 1.33  | 3.70E-04 | 0.041 |
| Atg7          | -0.59 | 5.83  | 3.71E-04 | 0.041 |
| Peg3          | 2.21  | 1.89  | 3.78E-04 | 0.041 |
| Sspo          | -1.00 | 1.82  | 3.83E-04 | 0.041 |
| Car5a         | -0.81 | 5.68  | 3.86E-04 | 0.041 |
| Art4          | 1.17  | 0.67  | 3.87E-04 | 0.041 |
| Srr           | -0.55 | 5.62  | 3.91E-04 | 0.041 |
| Rn45s         | -1.49 | 12.76 | 3.93E-04 | 0.041 |
| Ngp           | 4.45  | 1.58  | 4.07E-04 | 0.042 |
| Rbm14         | -0.61 | 4.45  | 4.10E-04 | 0.042 |
| Tmem63a       | -0.49 | 4.28  | 4.16E-04 | 0.042 |
| Adamts14      | 1.22  | 1.34  | 4.18E-04 | 0.042 |
| Adssl1        | -0.63 | 5.26  | 4.21E-04 | 0.042 |
| Gpr98         | 1.45  | 2.42  | 4.22E-04 | 0.042 |
| Baiap211      | 0.79  | 4.79  | 4.23E-04 | 0.042 |
| Gsto2         | -1.59 | -0.11 | 4.34E-04 | 0.043 |
| Plscr1        | 0.89  | 4.02  | 4.39E-04 | 0.043 |
| 2610019F03Rik | 0.65  | 3.64  | 4.42E-04 | 0.043 |
| 4930539E08Rik | 1.73  | -0.08 | 4.45E-04 | 0.043 |
| Limd2         | -0.64 | 5.55  | 4.46E-04 | 0.043 |
| Snai3         | 3.27  | -2.23 | 4.49E-04 | 0.043 |
| Htra3         | 1.56  | 1.20  | 4.54E-04 | 0.043 |
| Rad51d        | 0.44  | 4.26  | 4.60E-04 | 0.044 |
| Snhg5         | 0.95  | 2.35  | 4.70E-04 | 0.044 |
| Psmb9         | -1.42 | 4.66  | 4.83E-04 | 0.045 |
| Ethel         | -0.91 | 6.47  | 4.83E-04 | 0.045 |
| Fut1          | 2.35  | -0.25 | 4.91E-04 | 0.045 |
| Mcu           | -0.92 | 4.84  | 5.02E-04 | 0.046 |
| Baat          | -0.47 | 7.92  | 5.35E-04 | 0.049 |
| Cirbp         | 0.79  | 5.36  | 5.35E-04 | 0.049 |

|         |       |      |          |       |
|---------|-------|------|----------|-------|
| St3gal5 | 1.26  | 7.03 | 5.41E-04 | 0.049 |
| Qdpr    | -0.62 | 8.76 | 5.43E-04 | 0.049 |

---



eTable 4 – Differentially expressed genes by 17  $\alpha$  estradiol in growth hormone receptor knockout female mice

| Gene          | logFC | logCPM | PValue   | FDR      |
|---------------|-------|--------|----------|----------|
| Nrap          | -4.58 | 0.95   | 1.41E-09 | 2.03E-05 |
| Ankrd23       | -2.93 | 2.60   | 1.02E-08 | 6.62E-05 |
| Mylpf         | -4.89 | 1.71   | 1.77E-08 | 6.62E-05 |
| Atp2a1        | -6.98 | 3.30   | 1.84E-08 | 6.62E-05 |
| Pygm          | -3.53 | 1.99   | 6.52E-08 | 1.87E-04 |
| Cox8b         | -6.04 | 1.07   | 9.73E-08 | 2.33E-04 |
| Atp1a2        | -5.07 | 1.79   | 1.45E-07 | 2.98E-04 |
| Pgam2         | -3.18 | 0.77   | 3.39E-07 | 0.001    |
| Xirp1         | -7.22 | -0.72  | 4.78E-07 | 0.001    |
| Fabp3         | -6.21 | 1.27   | 5.28E-07 | 0.001    |
| Des           | -2.51 | 3.24   | 1.05E-06 | 0.001    |
| Slc25a4       | -2.61 | 3.47   | 1.31E-06 | 0.002    |
| Ttn           | -7.67 | 2.63   | 1.37E-06 | 0.002    |
| Ak1           | -4.82 | 0.16   | 1.77E-06 | 0.002    |
| Klhl41        | -4.17 | -0.50  | 2.58E-06 | 0.002    |
| Tmem38a       | -2.23 | 1.76   | 2.70E-06 | 0.002    |
| Neb           | -2.63 | 3.00   | 2.89E-06 | 0.002    |
| Tnni2         | -7.75 | 2.72   | 3.16E-06 | 0.003    |
| 9530077C05Rik | -4.77 | 0.57   | 3.98E-06 | 0.003    |
| Hhex          | -1.12 | 5.87   | 3.99E-06 | 0.003    |
| Slc41a2       | -2.47 | 5.16   | 5.21E-06 | 0.004    |
| Mybpc2        | -4.64 | -0.23  | 6.77E-06 | 0.004    |
| Dcstamp       | 1.49  | 0.25   | 7.81E-06 | 0.005    |
| Rpl3l         | -3.55 | -0.26  | 1.42E-05 | 0.008    |
| Lmcd1         | -3.00 | -0.67  | 1.42E-05 | 0.008    |
| Il15ra        | 0.84  | 4.63   | 1.93E-05 | 0.011    |
| Tpm1          | -1.19 | 5.42   | 1.98E-05 | 0.011    |
| Proser2       | -0.85 | 4.72   | 2.31E-05 | 0.012    |
| Myom1         | -3.62 | 1.11   | 2.84E-05 | 0.014    |
| Npas2         | -3.38 | 1.77   | 2.96E-05 | 0.014    |
| Asap2         | -1.41 | 3.44   | 3.51E-05 | 0.016    |
| Gadd45g       | -3.26 | 4.63   | 3.82E-05 | 0.017    |
| Cacna1s       | -5.51 | -0.08  | 3.90E-05 | 0.017    |
| Cryab         | -1.62 | 2.11   | 4.62E-05 | 0.019    |
| Col15a1       | -1.59 | 3.33   | 5.42E-05 | 0.022    |
| Eno3          | -1.63 | 3.01   | 5.47E-05 | 0.022    |
| Pkia          | -2.62 | 0.11   | 6.13E-05 | 0.024    |
| H19           | -4.23 | 2.78   | 7.30E-05 | 0.027    |

|        |       |       |          |       |
|--------|-------|-------|----------|-------|
| Flnc   | -4.96 | 0.16  | 7.47E-05 | 0.027 |
| Nexn   | -2.61 | -0.36 | 7.53E-05 | 0.027 |
| Hk2    | -2.34 | 0.92  | 7.87E-05 | 0.028 |
| Me3    | -3.05 | -1.80 | 1.00E-04 | 0.034 |
| Igdcc4 | -5.14 | 1.21  | 1.07E-04 | 0.036 |
| Saa2   | -5.71 | 10.10 | 1.12E-04 | 0.037 |
| Shisa2 | -2.33 | -1.27 | 1.33E-04 | 0.042 |

---

eTable 5 – Regulated KEGG pathways by 17  $\alpha$  estradiol in normal control male mice

| Pathway                                              | stat.mean | p.val | set.size |
|------------------------------------------------------|-----------|-------|----------|
| mmu03040 Spliceosome                                 | -2.843    | 0.003 | 117      |
| mmu03050 Proteasome                                  | -2.566    | 0.007 | 41       |
| mmu00190 Oxidative phosphorylation                   | -2.268    | 0.012 | 106      |
| mmu00100 Steroid biosynthesis                        | -2.211    | 0.018 | 15       |
| mmu00900 Terpenoid backbone biosynthesis             | -2.171    | 0.020 | 14       |
| mmu04070 Phosphatidylinositol signaling system       | 2.065     | 0.020 | 67       |
| mmu00240 Pyrimidine metabolism                       | -1.978    | 0.025 | 92       |
| mmu04141 Protein processing in endoplasmic reticulum | -1.952    | 0.026 | 151      |
| mmu04012 ErbB signaling pathway                      | 1.942     | 0.027 | 75       |
| mmu03030 DNA replication                             | -1.951    | 0.028 | 35       |
| mmu04976 Bile secretion                              | 1.901     | 0.030 | 61       |
| mmu04122 Sulfur relay system                         | -2.047    | 0.031 | 10       |
| mmu04614 Renin-angiotensin system                    | 2.020     | 0.031 | 12       |
| mmu02010 ABC transporters                            | 1.781     | 0.039 | 40       |
| mmu00250 Alanine, aspartate and glutamate metabolism | -1.742    | 0.044 | 28       |
| mmu04612 Antigen processing and presentation         | -1.705    | 0.046 | 57       |
| mmu00140 Steroid hormone biosynthesis                | 1.671     | 0.050 | 40       |

eTable 6 – Regulated KEGG pathways by 17  $\alpha$  estradiol in growth hormone receptor knockout (GHRKO) control male mice

| Pathway                                               | stat.mean | p.val    | set.size |
|-------------------------------------------------------|-----------|----------|----------|
| mmu03030 DNA replication                              | -3.567    | 3.34E-04 | 35       |
| mmu04110 Cell cycle                                   | -3.431    | 3.60E-04 | 117      |
| mmu04672 Intestinal immune network for IgA production | 2.303     | 0.012    | 31       |
| mmu04270 Vascular smooth muscle contraction           | 2.232     | 0.013    | 91       |
| mmu04630 Jak-STAT signaling pathway                   | 2.201     | 0.015    | 101      |
| mmu04640 Hematopoietic cell lineage                   | 2.155     | 0.017    | 65       |
| mmu04514 Cell adhesion molecules (CAMs)               | 1.997     | 0.024    | 100      |
| mmu03420 Nucleotide excision repair                   | -1.916    | 0.030    | 43       |
| mmu00590 Arachidonic acid metabolism                  | 1.856     | 0.033    | 61       |
| mmu00500 Starch and sucrose metabolism                | -1.860    | 0.033    | 40       |
| mmu04660 T cell receptor signaling pathway            | 1.839     | 0.034    | 95       |
| mmu03440 Homologous recombination                     | -1.871    | 0.034    | 25       |
| mmu00230 Purine metabolism                            | -1.797    | 0.037    | 141      |
| mmu04020 Calcium signaling pathway                    | 1.778     | 0.038    | 116      |
| mmu04610 Complement and coagulation cascades          | 1.752     | 0.041    | 68       |
| mmu00900 Terpenoid backbone biosynthesis              | -1.818    | 0.041    | 14       |
| mmu04973 Carbohydrate digestion and absorption        | -1.732    | 0.044    | 32       |
| mmu00100 Steroid biosynthesis                         | -1.766    | 0.045    | 15       |
| mmu00480 Glutathione metabolism                       | -1.711    | 0.045    | 49       |
| mmu04114 Oocyte meiosis                               | -1.682    | 0.047    | 91       |
| mmu00380 Tryptophan metabolism                        | -1.680    | 0.049    | 33       |

eTable 7 – Regulated KEGG pathways by 17  $\alpha$  estradiol in normal control female mice

| Pathway                                               | stat.mean | p.val    | set.size |
|-------------------------------------------------------|-----------|----------|----------|
| mmu04612 Antigen processing and presentation          | -5.098    | 7.30E-07 | 57       |
| mmu00980 Metabolism of xenobiotics by cytochrome P450 | -3.372    | 4.94E-04 | 66       |
| mmu00982 Drug metabolism - cytochrome P450            | -3.362    | 4.96E-04 | 75       |
| mmu04141 Protein processing in endoplasmic reticulum  | -3.155    | 0.001    | 151      |
| mmu04145 Phagosome                                    | -3.000    | 0.001    | 130      |
| mmu03050 Proteasome                                   | -2.798    | 0.003    | 41       |
| mmu00190 Oxidative phosphorylation                    | -2.700    | 0.004    | 106      |
| mmu00100 Steroid biosynthesis                         | -2.916    | 0.004    | 15       |
| mmu03320 PPAR signaling pathway                       | 2.635     | 0.005    | 66       |
| mmu04672 Intestinal immune network for IgA production | -2.658    | 0.005    | 31       |
| mmu04623 Cytosolic DNA-sensing pathway                | -2.507    | 0.007    | 40       |
| mmu04115 p53 signaling pathway                        | 2.259     | 0.013    | 59       |
| mmu00052 Galactose metabolism                         | -2.231    | 0.015    | 24       |
| mmu00900 Terpenoid backbone biosynthesis              | -1.983    | 0.029    | 14       |
| mmu03040 Spliceosome                                  | -1.833    | 0.034    | 117      |
| mmu00330 Arginine and proline metabolism              | -1.819    | 0.036    | 45       |
| mmu04512 ECM-receptor interaction                     | 1.807     | 0.037    | 69       |
| mmu04666 Fc gamma R-mediated phagocytosis             | -1.795    | 0.037    | 80       |
| mmu00053 Ascorbate and aldarate metabolism            | -1.813    | 0.040    | 21       |
| mmu04973 Carbohydrate digestion and absorption        | -1.769    | 0.041    | 32       |
| mmu00591 Linoleic acid metabolism                     | -1.740    | 0.044    | 29       |
| mmu00514 Other types of O-glycan biosynthesis         | -1.697    | 0.048    | 31       |

eTable 8 – Regulated KEGG pathways by 17  $\alpha$  estradiol in growth hormone receptor knockout (GHRKO) control female mice

| Pathway                                      | stat.mean | p.val | set.size |
|----------------------------------------------|-----------|-------|----------|
| mmu04974 Protein digestion and absorption    | -2.824    | 0.003 | 52       |
| mmu04260 Cardiac muscle contraction          | -2.682    | 0.005 | 53       |
| mmu04145 Phagosome                           | -2.598    | 0.005 | 130      |
| mmu04146 Peroxisome                          | 2.521     | 0.007 | 75       |
| mmu00010 Glycolysis / Gluconeogenesis        | -2.226    | 0.014 | 53       |
| mmu00071 Fatty acid metabolism               | 2.162     | 0.017 | 44       |
| mmu04540 Gap junction                        | -2.083    | 0.020 | 67       |
| mmu04510 Focal adhesion                      | -1.994    | 0.024 | 171      |
| mmu04970 Salivary secretion                  | -1.740    | 0.043 | 55       |
| mmu04020 Calcium signaling pathway           | -1.727    | 0.043 | 116      |
| mmu04612 Antigen processing and presentation | -1.702    | 0.046 | 57       |
| mmu04512 ECM-receptor interaction            | -1.695    | 0.046 | 69       |
| mmu00770 Pantothenate and CoA biosynthesis   | 1.749     | 0.046 | 14       |
| mmu04514 Cell adhesion molecules (CAMs)      | -1.652    | 0.050 | 100      |
